# Supplementary material for: Richness of Colchic vegetation: comparison between refugia of south-western and East Asia
Source: Springer Nature journal article supplement (doi:10.1186/1472-6785-1-6), 2001-12-20
Supplement: Additional file 2 [file 1472-6785-1-6-s2.doc]

Appendix 2. Species shared by Adjara and Yakushima

*Acalypha australis*

*Alopecurus aequalis*

*Amaranthus lividus*

*Amaranthus retroflexus*

*Amaranthus spinosus*

*Anagallis arvensis*

*Arenaria serpyllifolia*

*Arthraxon hispidus*

*Avena fatua*

*Bidens bipinnata*

*Bidens tripartita*

*Boehmeria nivea*

*Brachypodium sylvaticum*

*Briza minor*

*Calystegia soldanella*

*Capsella bursa-pastoris*

*Cardamine impatiens*

*Carpesium abrotanoides*

*Carpesium cernuum*

*Centella asiatica*

*Cerastium glomeratum*

*Ceratopyllum demersum*

*Chenopodium album*

*Chenopodium ambrosioides*

*Coix lacrymajobi*

*Commelina communis*

*Crassocephalum crepidioides*

*Cynodon dactylon*

*Cyperus rotundus*

*Dactylis glomerata*

*Deschampsia caespitosa*

*Deschampsia flexuosa*

*Digitaria ciliaris*

*Digitaria violascens*

*Drosera rotundifolia*

*Echinochloa crus-gallii*

*Eleusine indica*

*Euphorbia helioscopia*

*Galium spurium*

*Glechoma hederacea*

*Hemerocallis fulva*

*Houttuynia cordata*

*Imperata cylindrica*

*Inula britannica*

*Juncus effusus*

*Lamium amplexicaule*

*Lespedeza cuneata*

*Lespedeza striata*

*Lindernia procumbens*

*Lonicera japonica*

*Lotus corniculatus*

*Lysimachia fortunei*

*Lysimachia japonica*

*Medicago lupulina*

*Medicago polymorpha*

*Medicago sativa*

*Melilotus alba*

*Microstegium japonicum*

*Miscanthus sinensis*

*Mosla dianthera*

*Myosoton aquaticum*

*Nasturtium officinale*

*Oplismenus undulatifolius*

*Oxalis acetosella*

*Oxalis corniculata*

*Paris quadrifolia*

*Parnassia palustris*

*Paspalum dilatatum*

*Paspalum thunbergii*

*Phragmites australis*

*Phytolacca americana*

*Plantago lanceolata*

*Polygonum aviculare*

*Polypogon monspeliensis*

*Portulaca oleracea*

*Potamogeton crispus*

*Prunella vulgaris*

*Ranunculus sceleratus*

*Rhus javanica*

*Rorippa islandica*

*Sagittaria trifolia*

*Setaria faberii*

*Setaria viridis*

*Solanum nigrum*

*Solidago virgaurea*

*Sonchus asper*

*Sonchus oleraceus*

*Sorghum halepense*

*Spergula arvensis*

*Spirodela polyrrhiza*

*Sporobolus fertilis*

*Stellaria media*

*Torilis japonica*

*Trifolium repens*

*Tritonia crocosmifo;oa*

*Typha angustifolia*

*Verbena officinalis*

*Veronica arvensis*

*Vicia angustifolia*

*Vicia hirsuta*

*Vicia sativa*

*Vicia tetrasperma*

*Viola mandschurica*

*Vitex rotundifloia*

*Xanthium strumarium*

Zostera marina
